1  
2  
3  
4  
5  
6  
7  
8  
9  
10  
11  
12  
13  
14  
15  
16  
17  
18  
19

Using machine learning models to predict oxygen saturation following ventilator support adjustment in critically ill children: a single center pilot study.

Sam Ghazal<sup>1</sup>, Michael Sauthier<sup>2</sup>, David Brossier<sup>2</sup>, Wassim Bouachir<sup>3</sup>, Philippe Jovet<sup>2\*</sup> and Rita Noumeir<sup>1</sup>

<sup>1</sup> Department of health information analysis, École de Technologie Supérieure (ÉTS), Montreal, Quebec, Canada

<sup>2</sup> Department of Pediatrics, Sainte-Justine Hospital, Montreal, Quebec, Canada

<sup>3</sup> LICEF research center, TÉLUQ University, Montreal, Quebec, Canada

\* Corresponding author:

[philippe.jovet@umontreal.ca](mailto:philippe.jovet@umontreal.ca) (PJ)

## 20 Abstract

21 Clinicians' experts in mechanical ventilation are not continuously at each patient's bedside in  
22 an intensive care unit to adjust mechanical ventilation settings and to analyze the impact of  
23 ventilator settings adjustments on gas exchange. The development of clinical decision support  
24 systems analyzing patients' data in real time offers an opportunity to fill this gap. The  
25 objective of this study was to determine whether a machine learning predictive model could  
26 be trained on a set of clinical data and used to predict hemoglobin oxygen saturation 5 min  
27 after a ventilator setting change. Data of mechanically ventilated children admitted between  
28 May 2015 and April 2017 were included and extracted from a high-resolution research  
29 database. More than  $7.10^5$  rows of data were obtained from 610 patients, discretized into 3  
30 class labels. Due to data imbalance, four different data balancing process were applied and  
31 two machine learning models (artificial neural network and Bootstrap aggregation of complex  
32 decision trees) were trained and tested on these four different balanced datasets. The best  
33 model predicted SpO<sub>2</sub> with accuracies of 76%, 62% and 96% for the SpO<sub>2</sub> class "< 84%", "85  
34 to 91%" and "> 92%", respectively. This pilot study using machine learning predictive model  
35 resulted in an algorithm with good accuracy. To obtain a robust algorithm, more data are  
36 needed, suggesting the need of multicenter pediatric intensive care high resolution databases.

37

38

## 39 Introduction

40 In case of respiratory failure, mechanical ventilation supports the oxygen (O<sub>2</sub>) diffusion into  
41 the lungs and the carbon dioxide (CO<sub>2</sub>) body removal. As an expert in mechanical ventilation  
42 cannot reasonably be expected to be continuously present at the patient's bedside, specific  
43 medical devices aimed to help in ventilator settings adjustments may help to improve the  
44 quality of care. Such devices are developed using either algorithms based on respiratory  
45 physiology/medical knowledge that adapt ventilator settings in real time based on patients'  
46 characteristics but are not accurate enough to be used widely in clinical practice, especially in  
47 children [1, 2]; or physiologic models that simulate cardiorespiratory responses to mechanical  
48 ventilation settings modifications but none was validated for this indication [3]. The above-  
49 mentioned models all share the limitation of not being suited to learn from ever-growing sets  
50 of clinical research data, and potentially improve their performances. To overcome this  
51 drawback, another avenue is the development of algorithms using artificial Intelligence to  
52 provide caregivers with support in their decision-making tasks. In this study, we assessed  
53 machine learning methods to predict transcutaneous hemoglobin saturation oxygen (SpO<sub>2</sub>) of  
54 mechanically ventilated children after a ventilator setting change using a high resolution  
55 research database.

56

## 57 Materials and Methods

58 This study was conducted at Sainte-Justine Hospital and included the data collected  
59 prospectively between May 2015 and April 2017 of all the children, age under 18 years old,  
60 admitted to the Pediatric Intensive Care Unit (PICU) who were mechanically ventilated with  
61 an endotracheal tube. Patients' data were excluded if the patient was hemodynamically  
62 unstable defined as 2 or more vasoactive drugs delivered at the same time (ie., epinephrine,

63 norepinephrine, dopamine or vasopressin) or with an uncorrected cyanotic heart disease  
64 defined by no  $SpO_2 > 97\%$  during all PICU stay. All the respiratory data from included  
65 patients were extracted from the PICU research database [4], after study approval by the  
66 ethical review board of Sainte-Justine hospital (number 2017 1480).

67

## 68 Data extraction

69 To determine the data that will be extracted for each child, an item generation was  
70 conducted by three physicians (PJ, MS, DB). The resulting items are presented in Fig 1 within  
71 their sources, means of extraction and a schematic of the main components of the study.  
72 The predictive  $SpO_2$  value was the  $SpO_2$  5 minutes after a change of a ventilator setting. The  
73 delay of 5 min corresponded to the shortest period of time to reach a steady state after  
74 modification of a ventilator setting [5].

75 **Fig 1. Schematic description of the analysis process and items involved.** EMR: electronic  
76 Medical Record,  $FiO_2$ : inspired fraction of Oxygen, Vt: tidal volume, PEEP:  
77 Positive end expiratory pressure, PS above PEEP: pressure support level Above  
78 PEEP, PC above PEEP: pressure control level above PEEP, MVe: expiratory  
79 minute volume, I:E Ratio: inspiratory time over expiratory time, Measured RR:  
80 respiratory rate measured by the ventilator, PIP: positive inspiratory pressure ie  
81 maximal pressure measured during inspiration.  $_{5min}SpO_2$ :  $SpO_2$  observed 5 min  
82 after PEEP,  $FiO_2$ , tidal volume, PS above PEEP, PC above PEEP change, ML:  
83 machine learning, ANN: artificial neural network, BACDT: Bootstrap aggregation  
84 complex decision trees.

85

## 86 Data formatting

87 The data extracted from the research database needed: (1) to remove erroneous data due to  
88 disconnection of the patient from the ventilator or the monitor, or due to transient  
89 interventions such as suctioning; (2) to remove the rows at which no ventilator setting  
90 variables was modified; (3) to adapt data format for classifier training. The methodology to  
91 format the data is described in S1 file.

92

## 93 Data categorization

94 SpO<sub>2</sub> levels at 5min were classified into three categories (Table 1). The thresholds were  
95 selected according to clinical value: a SpO<sub>2</sub> < 92% is a target to increase oxygenation in  
96 mechanically ventilated children [6]. The critical level of 85% SpO<sub>2</sub> is used as an alarm of  
97 severe hypoxemia in intensive care [7].

98

99 **Table 1: Definition of SpO<sub>2</sub> class labels specifications**

| SpO <sub>2</sub> classification | SpO <sub>2</sub> range (%) | Rows number (n) |
|---------------------------------|----------------------------|-----------------|
| 1                               | < 84                       | 17,112          |
| 2                               | 85 to 91                   | 29,869          |
| 3                               | 92 to 100                  | 729,746         |

100

## 101 Data balancing

102 The data analysis showed a severe imbalance with most SpO<sub>2</sub> at 5min above 92%. This is  
103 logical as caregivers want to maintain SpO<sub>2</sub> in normal range during child PICU stay. In such  
104 condition, the classifier learns the majority class label (class 3) (Table 1) but doesn't learn the  
105 minority class labels (class 1 and 2) [8]. The data balancing process aims to allow the

106 classifier to learn from all class equally. The data balancing process used in this study  
107 included a combination of down-sampling and up-sampling techniques: to balance the three  
108 classes of the data involved, a down-sampling of the SpO<sub>2</sub> class 3 using TOMER algorithm [9]  
109 and an over-sampling of SpO<sub>2</sub> class 1 and 2 using Synthetic Minority Oversampling  
110 Technique (SMOTE) [10] were performed.

111 The creation of synthetic data points by SMOTE can be formulated as follows:

$$112 \quad x_{syn} = x_i + (x_{knn} - x_i) \times \delta \quad (2)$$

113 In equation (2),  $x_{syn}$  represents the synthetic data point. The variables  $x_i$  and  $x_{knn}$  are  
114 respectively the original instance, and the nearest neighbor data point which is randomly  
115 picked among the  $k$  nearest neighbors.. The random number  $\delta$  is generated in [0,1] to  
116 determine the position of the created synthetic data point along a straight line joining the  
117 original data point  $x_i$  and its chosen nearest neighbor  $x_{knn}$ .

118 To study which data balancing method provided the more accurate algorithm, four datasets  
119 were produced via four different balancing procedures, involving different combinations of  
120 data balancing techniques (Fig 2).

121 **Fig 2. Descriptions of the four balancing procedures.**

122

## 123 Predicted SpO<sub>2</sub> Classification

124 To identify the best machine learning classification method, we tested two classification  
125 models: artificial neural network and bagged complex decision trees, on the four balanced  
126 datasets.

### 127 Artificial Neural Network (ANN)

128 Once the data has been pre-processed, a machine learning predictive model was trained on a  
129 sub-set of labeled training data. The model is then used to predict the target variable values on

130 a testing subset where the class labels are hidden. We used Artificial Neural Networks  
131 (ANN) to make predictions of the SpO<sub>2</sub> variable, based on the values of other variables of  
132 interest. Through the function approximation that the ANN performs, it is possible to make  
133 predictions of SpO<sub>2</sub> variable, based on the input data.

134

135 The ANN is learned from training data, using the backpropagation algorithm [11] and is  
136 tested on a test set made of the remaining rows of data to validate the generalization of the  
137 model. The learning algorithm runs through all the rows of data in the training data set and  
138 compares the predicted outputs with the target outputs found in the training data set. The  
139 weights are adjusted via supervised learning, in a manner to minimize the error of predicted  
140 SpO<sub>2</sub> vs target SpO<sub>2</sub>. The process is repeated until the error is minimized.

141

142 The ANN classifier was implemented through cycles of forward propagation followed by  
143 backward propagation through the network's layers. The backpropagation algorithm is used  
144 for performance optimization.

145 For a given number of classes  $K > 2$ , the cross-entropy error can be formulated as shown in  
146 eq. 3, where  $(W_i)_i$  is the matrix of weights between the neuron layers,  $r_i$  is the target value.  $y_i$  is  
147 the value generated by the ANN, ie., its output.

148 
$$E^t((W_i)_i | x^t, r^t) = - \sum_i r_i^t \log y_i^t \quad (3)$$

149 The outputs of the ANN are:

150 
$$y_i^t = \frac{\exp w_i^t x^t}{\sum_k \exp w_k^t x^t} \quad (4)$$

151 Using stochastic gradient-descent (SGD) for error minimization, the update rule for the ANN  
152 weights is:

153 
$$\Delta w_{ij}^t = n(r_i^t - y_i^t)x_j^t \quad (5)$$

154 In equation 5,  $\eta$  is the learning rate, which, when SGD is used, decreases as the error is  
155 minimized. During ANN training, each observation, comprised of an input vector and a target  
156 output, is denoted  $(\mathbf{x}^i, \mathbf{r}^i)$ , with  $\mathbf{r}^i \in (\text{"1"}, \text{"2"}, \text{"3"})$ . The reason why the cross-entropy (eq. 3) is  
157 used instead of the Least Square Error (LSE) is to avoid long periods of training, due to the  
158 ANN going through stages of slow error reduction.

159

## 160 Bootstrap aggregation of complex decision trees

161 Bootstrap aggregating (acronym: bagging) was proposed by L Breiman in 1994 to improve  
162 classification by combining classifications of randomly generated training sets [12]. Bagging  
163 allows for the creation of an aggregated predictor via the use of multiple training sub-sets  
164 taken from the same training set. Let  $(\mathbf{T}^i)$  denote the replicate training sub-sets bootstrapped  
165 from the training set  $\mathbf{T}$ . These replicate sub-sets each contain  $N$  observations, drawn at  
166 random and with replacement from  $\mathbf{T}$ . For each of these sub-sets of  $N$  observations, a  
167 prediction model, or classifier, is created. The computational model we used for bagging was  
168 complex decision trees. This means that, for each bootstrapped sub-set of training data, a  
169 complex decision tree is trained and thus a classifier is created. If  $i = 1, \dots, n$ , then  $n$   
170 classifiers are created through the bagging process.

171

172 A decision tree is a flowchart computational model which can be used for both regression, as  
173 well as classification problems. Paths from the root of the tree to its various leaf nodes go  
174 through decision nodes in which decision rules are applied in a recursive manner, based on  
175 values of input variables. Each path represents an observation  $(\mathbf{X}, y) = (x_1, x_2, x_3, \dots, x_n, y)$ ,  
176 where the label assigned to the target  $y$  is given in the leaf node, at the end of the path, ie.,  
177 classification [13].

178



179 In the aim of maximizing the model's generalization capability during the training process,  
180 the Bagged Complex Trees' performance is tested via  $k$ -fold cross-validation. A value  $k = 10$ ,  
181 which is common practice, was used in this study. The training using  $k$ -fold cross-validation  
182 is carried out as described in Fig 3.

### 183 **Fig 3. $k$ -fold cross-validation**

184

185 The mathworks Matlab R2016b Machine Learning toolbox was used for the creation of the  
186 ensemble of Bagged complex trees model.

187

### 188 **Assessment of the performances of the classifiers**

189 We evaluated the performances of the classifiers based on the metrics including testing  
190 confusion matrix, average accuracy, precision, recall and F score [14] with a  $_{5\min}\text{SpO}_2$   
191 prediction expected above 0.9 for each class.

192

#### 193 • **Precision**

$$194 \quad \textit{Precision} = \frac{\# \textit{ True positives class } i}{\textit{ Total \# classifications for class } i} \quad (6)$$

195 The *Precision* (eq. 6) is the ratio of all correct classifications for class  $i$  to all instances labeled  
196 as class label  $i$  by the model. In a non-normalized confusion matrix, this would mean  
197 dividing the number of instances classified in class label  $i$  by the total of instances in column  
198  $i$ .

199

#### 200 ■ **Recall**

$$201 \quad \textit{Recall} = \frac{\# \textit{ True positives class } i}{\textit{ Total \# observations class } i} \quad (7)$$

202 Recall is the ratio of the number of instances classified in class label  $i$  to the number of true  
203 class  $i$  labels. In a non-normalized matrix, this would require dividing the number of  
204 instances classified in class label  $i$  by the total of row  $i$

205

206● F-score

$$207 \quad F - score = \frac{2}{\frac{1}{recall} + \frac{1}{precision}} \quad (8)$$

208 The F-score provides a single measure of classification performance of the model used.

209

## 210 Results and discussion

211 We developed and assessed the performances of two machine learning classifiers on four  
212 different balanced datasets to predict SpO<sub>2</sub> at 5 min after a ventilator setting change (*ie* FiO<sub>2</sub>,  
213 PEEP, Vt/Pressure), in 610 mechanically ventilated children. In Fig 4 and Table 2, we report  
214 the performances of these two classifiers. Using the classification performance metrics, the  
215 bagged trees classifier trained on dataset #3 (see Fig 2) has yielded the best classification  
216 performance on the test sets (Table 2). The confusion matrix of the whole bagged trees  
217 shows that SpO<sub>2</sub> at 5 min could correctly predict in **76%** of class “1” data, **62%** of class “2”,  
218 and **96%** of class “3” (Fig 4). This huge variation in classification performances of the three  
219 class labels can be explained by the large variation in the numbers of observations available  
220 for each of the class labels in the initial dataset that has limited the machine learning (Table  
221 1).

222

223 **Fig 4. Artificial neural network (ANN) and bootstrap aggregation of complex decision trees**  
224 **(BACDT) test confusion matrices.** The darker colors represent higher levels of accuracy. A:

225 balanced dataset 1, B: balanced dataset 2, C: balanced dataset 3, D: balanced dataset 4 (see  
 226 Fig 2).  
 227

228 **Table 2. Performance of artificial neural networks (ANN) and bootstrap aggregation of**  
 229 **complex decision trees (BACDT) classifiers for SpO<sub>2</sub> prediction at 5 min following a**  
 230 **ventilator setting change. Avg/total: average accuracy of total classification values. In italics**  
 231 **is the performance of the best predictive model obtained among the eight tested.**  
 232

| Balanced datasets | 5minSpO <sub>2</sub> class | ANN       |        |         | BACDT       |             |             |
|-------------------|----------------------------|-----------|--------|---------|-------------|-------------|-------------|
|                   |                            | Precision | Recall | F-score | Precision   | Recall      | F-score     |
| <b>Dataset 1</b>  | 1                          | 0.12      | 0.70   | 0.21    | 0.80        | 0.76        | 0.78        |
|                   | 2                          | 0.16      | 0.43   | 0.23    | 0.61        | 0.56        | 0.59        |
|                   | 3                          | 0.96      | 0.67   | 0.79    | 0.97        | 0.98        | 0.97        |
|                   | Avg/total                  | 0.88      | 0.65   | 0.73    | 0.94        | 0.94        | 0.94        |
| <b>Dataset 2</b>  | 1                          | 0.09      | 0.72   | 0.16    | 0.77        | 0.72        | 0.74        |
|                   | 2                          | 0.09      | 0.47   | 0.16    | 0.57        | 0.53        | 0.55        |
|                   | 3                          | 0.98      | 0.70   | 0.81    | 0.98        | 0.99        | 0.98        |
|                   | Avg/total                  | 0.93      | 0.69   | 0.78    | 0.96        | 0.97        | 0.97        |
| <b>Dataset 3</b>  | 1                          | 0.16      | 0.68   | 0.25    | <i>0.80</i> | <i>0.76</i> | <i>0.78</i> |
|                   | 2                          | 0.26      | 0.42   | 0.33    | <i>0.67</i> | <i>0.62</i> | <i>0.65</i> |
|                   | 3                          | 0.92      | 0.60   | 0.72    | <i>0.95</i> | <i>0.96</i> | <i>0.96</i> |
|                   | Avg/total                  | 0.80      | 0.58   | 0.65    | <i>0.91</i> | <i>0.91</i> | <i>0.91</i> |
| <b>Dataset 4</b>  | 1                          | 0.09      | 0.69   | 0.16    | 0.80        | 0.74        | 0.77        |
|                   | 2                          | 0.12      | 0.47   | 0.19    | 0.58        | 0.54        | 0.56        |
|                   | 3                          | 0.97      | 0.68   | 0.80    | 0.98        | 0.98        | 0.98        |
|                   | Avg/total                  | 0.92      | 0.67   | 0.76    | 0.96        | 0.96        | 0.96        |

233  
 234 For the artificial neural network, the variation of the number of hidden layers and number of  
 235 neurons per hidden layer did not seem to have a significant effect on the model's  
 236 classification performance (Table 3). As for the Bagged complex trees, the variation of the  
 237 number of complex trees did not yield significant changes in classification performance  
 238 (Table 4).  
 239

240 **Table 3. Absence of impact on performance of the increase of neurons and hidden layers**  
 241 **for artificial neural network (ANN). Example of the performance assessed by the F score on**  
 242 **the balanced dataset 3 (see fig 2)**

243

244

| ANN                      |                                |    |    |     |    |    |     |    |    |     |
|--------------------------|--------------------------------|----|----|-----|----|----|-----|----|----|-----|
| Hidden layers (n)        |                                | 1  |    |     | 2  |    |     | 3  |    |     |
| Neurons/hidden layer (n) |                                | 10 | 50 | 100 | 10 | 50 | 100 | 10 | 50 | 100 |
| <b>F-score</b>           | $_{5\min}\text{SpO}_2$ class 1 | 25 | 25 | 25  | 25 | 25 | 25  | 22 | 22 | 19  |
|                          | $_{5\min}\text{SpO}_2$ class 2 | 33 | 33 | 33  | 33 | 33 | 33  | 33 | 33 | 32  |
|                          | $_{5\min}\text{SpO}_2$ class 3 | 72 | 72 | 72  | 72 | 72 | 72  | 69 | 69 | 69  |

245

246

247

248

249

**Table 4. Absence of impact on performance of the number of complex trees for bootstrap aggregation of complex decision trees (BACDT).** Example of the performance assessed by the F score on the balanced dataset 3 (see Fig 2)

|                |                                | BACDT  |      |
|----------------|--------------------------------|--------|------|
|                |                                | n = 30 | n=50 |
| <b>F-score</b> | $_{5\min}\text{SpO}_2$ class 1 | 78     | 78   |
|                | $_{5\min}\text{SpO}_2$ class 2 | 65     | 65   |
|                | $_{5\min}\text{SpO}_2$ class 3 | 96     | 96   |

250

251

252

253

254

255

256

257

258

259

260

261

262

263

In agreement with previous studies regarding bagging being a better method for medical data classification, tree Bagging fared better than the artificial neural network used in this study [12]. It is noteworthy however that the gaps in performance results between the training and testing confusion matrices are relatively higher in the case of bagged trees model than in that of the artificial neural network (Fig 5). This seems to indicate that, although the bagged trees model was capable of learning very well from the data, there's still room for improvement in the generalization. The SMOTE algorithm is designed in such a way that should theoretically not affect the generalization of the trained model. In cases of extreme data imbalance, however, as is the case in this study, the over-sampling within the data space of a given minority class label, used for increasing the cardinality of the class label's set, is also likely to be extreme. This may render the data space of this class relatively dense with respect to the rest of the data, made up of real data points of the studied patient sub-population. This may potentially explain the classification model's relatively poor

264 generalization for  $_{5\text{min}}\text{SpO}_2$  class “1” and “2” with respect to the generalization for  $_{5\text{min}}\text{SpO}_2$   
265 class “3”. Also, since SMOTE generates synthetic data points by interpolating between  
266 existing minority class instances, it can obviously increase the risk of over-fitting when  
267 classifying minority class labels, since it may duplicate minority class instances. The fact that  
268 the training confusion matrix shows extremely high classification performances for the  
269 minority  $_{5\text{min}}\text{SpO}_2$  class “1” and “2”, as opposed to those shown in the testing confusion  
270 matrix, suggests that the over-sampling of the minority  $_{5\text{min}}\text{SpO}_2$  class using SMOTE could  
271 have caused some overfitting for these classes, but this would have to be further  
272 investigated.

273

274 **Fig 5. Training and testing confusion matrices of artificial neural networks (ANN) and**  
275 **bootstrap aggregation of complex decision trees (BACDT) classifiers for  $\text{SpO}_2$  prediction at**  
276 **5 min following a ventilator setting change.**

277

278 The strengths of this study include a large clinical database of mechanically ventilated  
279 children used with more than  $7.10^5$  rows. In a recent similar study in PICU, 200 patients were  
280 included with  $1.15.10^3$  rows [15]. However, the volume of data is clearly insufficient. To use  
281 such machine learning predictive models, the pediatric intensive care community needs to  
282 combine multicenter high resolution database. In addition, children data could be pooled to  
283 neonatal and adult intensive care data, when possible, such as MIMIC III database [16]. The  
284 other strength is the process used to transform the data into a usable format and to correct  
285 a variety of artifacts present (S1 file). In health care, there is a significant interest in using  
286 clinical databases including dynamic and patient-specific information into clinical decision  
287 support algorithms. The ubiquitous monitoring of critical care units’ patients has generated a  
288 wealth of data which presents many opportunities in this domain. However, when

289 developing algorithms domains, such as transport or finance, data are specifically collected  
290 for research purposes. This is not the case in healthcare where the primary objective of data  
291 collection systems is to document clinical activity, resulting in several issues to address in  
292 data collection, data validation and complex data analysis [17]. As detailed in S1 file, a  
293 significant amount of effort is needed, when data have been successfully archived and  
294 retrieved, to transform the data into a usable format for research.

295 This study has several limitations. The limited row number reduced the SpO<sub>2</sub> classification  
296 for machine learning predictive model to three clinically relevant classes. SpO<sub>2</sub> is a  
297 continuous variable and the use of three class is probably insufficient, especially when high  
298 SpO<sub>2</sub> range is suggested as potentially harmful [18, 19]. Instead of the classification model,  
299 the next step could be to test regression models' performance. SpO<sub>2</sub> was predicted at 5min  
300 after ventilator setting change, a clinically relevant delay. However, the delay between  
301 ventilator setting change and oxygenation steady state is not well defined and vary from 1 to  
302 71 minutes according to the parameter set (FiO<sub>2</sub>, PEEP or other parameters that change  
303 mean airway pressure) and clinical conditions studied [15, 20, 21]. This needs further  
304 research and probably more sophisticated clinical decision support systems using machine  
305 learning predictive models should consider these factors. Finally, we excluded hemodynamic  
306 unstable patients using a treatment criteria ( $\geq 2$  vasoactive drugs infused) because this  
307 condition decreases pulse oximeter reliability [22, 23]. The validation and electronic  
308 availability of reliable markers of hemodynamic instability in children such as  
309 plethysmographic variability indices could be helpful [24].

310

311 **Conclusion**

312 This pilot study using machine learning predictive model resulted in an algorithm with good  
313 accuracy. To obtain a robust algorithm with such a method, more data rows are needed,  
314 suggesting the need of multicenter pediatric intensive care high resolution databases.

315

## 316 Acknowledgments

317 We would like to thank Mr. Redha Eltaani for his support in all tasks related to data access at  
318 Ste-Justine Hospital. This work was supported by the Natural Sciences and Engineering  
319 Research Council of Canada (NSERC), by the Institut de Valorisation des Données (IVADO), by  
320 grants from the “Fonds de Recherche du Québec – Santé (FRQS)”, the Quebec Ministry of  
321 Health and Sainte Justine Hospital.

322

## 323 References

324

- 325 1. Rose L, Schultz M, Cardwell C, Jouvét P, McAuley D, Blackwood B. Automated versus non-  
326 automated weaning for reducing the duration of mechanical ventilation for critically ill adults and  
327 children: a cochrane systematic review and meta-analysis. *Crit Care*. 2015;19:48. doi:  
328 10.1186/s13054-015-0755-6.
- 329 2. Jouvét P, Eddington A, Payen V, Bordessoule A, Emeriaud G, Gasco R, et al. A pilot  
330 prospective study on closed loop controlled ventilation and oxygenation in ventilated children during  
331 the weaning phase. *Crit Care*. 2012;16(3):R85. doi: 10.1186/cc11343.
- 332 3. Flechelles O, Ho A, Hernert P, Emeriaud G, Zaglam N, Cheriet F, et al. Simulations for  
333 mechanical ventilation in children: review and future prospects. *Crit Care Res Pract*.  
334 2013;2013:943281. doi: 10.1155/2013/943281.

- 335 4. Brossier D, El Taani R, Sauthier M, Roumeliotis N, Emeriaud G, Jouvet P. Creating a High-  
336 Frequency Electronic Database in the PICU: The Perpetual Patient. *Pediatr Crit Care Med*.  
337 2018;19(4):e189-e98. doi: 10.1097/PCC.0000000000001460.
- 338 5. Cakar N, Tuörul M, Demirarslan A, Nahum A, Adams A, Akýncý O, et al. Time required for  
339 partial pressure of arterial oxygen equilibration during mechanical ventilation after a step change in  
340 fractional inspired oxygen concentration. *Intens Care Med* 2001;27(4):655-9.
- 341 6. Pediatric Acute Lung Injury Consensus Conference G. Pediatric acute respiratory distress  
342 syndrome: consensus recommendations from the Pediatric Acute Lung Injury Consensus Conference.  
343 *Pediatr Crit Care Med*. 2015;16(5):428-39. doi: 10.1097/PCC.0000000000000350.
- 344 7. Les recommandations des experts de la SRLF. Le monitoring et les alarmes ventilatoires des  
345 malades ventilés artificiellement. *Réanim Urgences*. 2000;9:407-12.
- 346 8. Chawla N, Japkowicz N, A. Kotcz A. Editorial: special issue on learning from imbalanced data  
347 sets. *ACM SIGKDD Explorations Newsletter*. 2004;6:1-6.
- 348 9. Elhassan T, Aljurf M, Al-Mohanna F, Shoukri M. Classification of Imbalance Data using Tomek  
349 Link (T-Link) Combined with Random Under-sampling (RUS) as a Data Reduction Method. *Journal of*  
350 *Informatics and Data Mining*. 2016;1:1-12.
- 351 10. Chawla N, Bowyer K, Hall L, Kegelmeyer W. SMOTE: Synthetic Minority Over-sampling  
352 Technique. *Journal of Artificial Intelligence Research*. 2002;16:321-57. doi: 10.1613/jair.953.
- 353 11. Gnana Sheela K, Deepa S. Review on methods to fix number of hidden neurons in neural  
354 networks. *Mathematical Problems in Engineering*. 2013;2013:11. doi: 10.1155/2013/425740.425740.
- 355 12. Breiman L. Bagging predictors. Berkeley: University of California, Statistics Do; 1994 421.
- 356 13. Safavian S, Landgrebe D. A survey of decision tree classifier methodology. *IEEE Transactions*  
357 *on Systems, Man, and Cybernetics*. 1991;21(3):660-74. doi: 10.1109/21.97458.
- 358 14. Sokolova M, Lapalme G. A systematic analysis of performance measures for classification  
359 tasks. *Information Processing & Management*. 2009;45(4):427-37. doi: 10.1016/j.ipm.2009.03.002.



- 360 15. Smallwood CD, Walsh BK, Arnold JH, Gouldstone A. Equilibration Time Required for  
361 Respiratory System Compliance and Oxygenation Response Following Changes in Positive End-  
362 Expiratory Pressure in Mechanically Ventilated Children. *Crit Care Med.* 2018;46(5):e375-e9. doi:  
363 10.1097/CCM.0000000000003001.
- 364 16. Johnson AE, Pollard TJ, Shen L, Lehman LW, Feng M, Ghassemi M, et al. MIMIC-III, a freely  
365 accessible critical care database. *Sci Data.* 2016;3:160035. doi: 10.1038/sdata.2016.35.
- 366 17. Johnson AE, Ghassemi MM, Nemati S, Niehaus KE, Clifton DA, Clifford GD. Machine Learning  
367 and Decision Support in Critical Care. *Proceedings of the IEEE Institute of Electrical and Electronics*  
368 *Engineers.* 2016;104(2):444-66. doi: 10.1109/JPROC.2015.2501978.
- 369 18. Girardis M, Busani S, Damiani E, Donati A, Rinaldi L, Marudi A, et al. Effect of Conservative vs  
370 Conventional Oxygen Therapy on Mortality Among Patients in an Intensive Care Unit: The Oxygen-  
371 ICU Randomized Clinical Trial. *JAMA.* 2016;316(15):1583-9. doi: 10.1001/jama.2016.11993.
- 372 19. Pannu SR, Dziadzko MA, Gajic O. How Much Oxygen? Oxygen Titration Goals during  
373 Mechanical Ventilation. *Am J Respir Crit Care Med.* 2016;193(1):4-5. doi: 10.1164/rccm.201509-  
374 1810ED.
- 375 20. Tugrul S, Cakar N, Akinci O, Ozcan PE, Disci R, Esen F, et al. Time required for equilibration of  
376 arterial oxygen pressure after setting optimal positive end-expiratory pressure in acute respiratory  
377 distress syndrome. *Crit Care Med.* 2005;33(5):995-1000.
- 378 21. Fildissis G, Katostaras T, Moles A, Katsaros A, Myrianthefs P, Brokalaki H, et al. Oxygenation  
379 equilibration time after alteration of inspired oxygen in critically ill patients. *Heart Lung.*  
380 2010;39(2):147-52. doi: 10.1016/j.hrtlng.2009.06.009.
- 381 22. Salyer J. Neonatal and pediatric pulse oximetry. *Respir care.* 2003;48(4):386-96.
- 382 23. Fouzas S, Priftis KN, Anthracopoulos MB. Pulse oximetry in pediatric practice. *Pediatrics.*  
383 2011;128(4):740-52. doi: 10.1542/peds.2011-0271.

384 24. Chandler JR, Cooke E, Petersen C, Karlen W, Froese N, Lim J, et al. Pulse oximeter  
385 plethysmograph variation and its relationship to the arterial waveform in mechanically ventilated  
386 children. J Clin Monit Comput. 2012;26(3):145-51. doi: 10.1007/s10877-012-9347-z.

387

## 388 Supporting information

389

390 **S1 File: Data formatting process**

**ANN**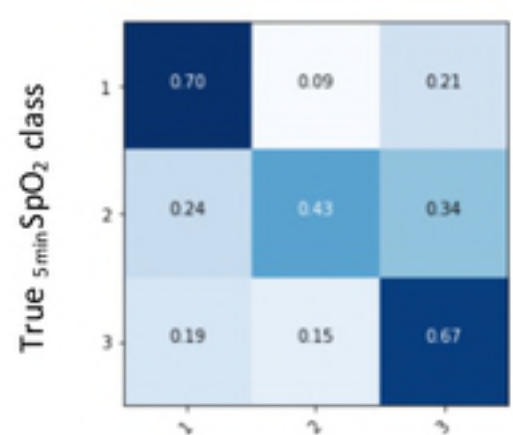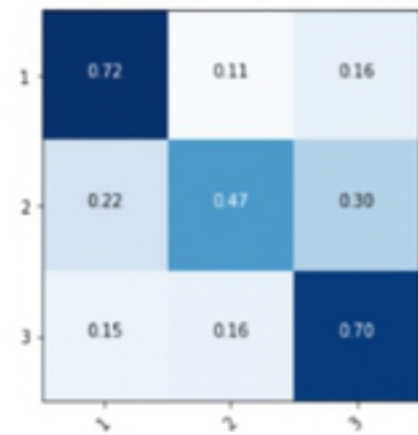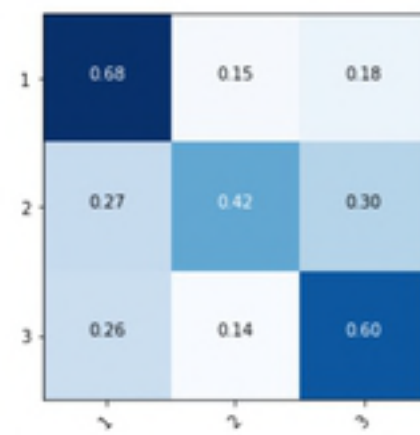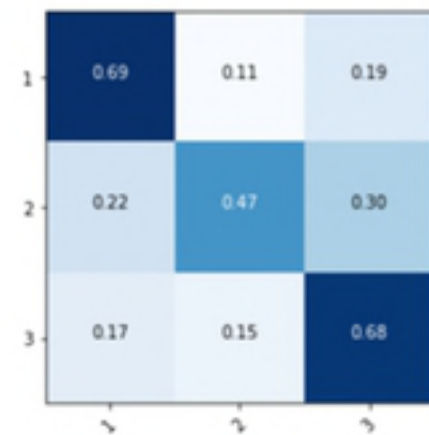Predicted  $_{5\min}\text{SpO}_2$  class**BACDT**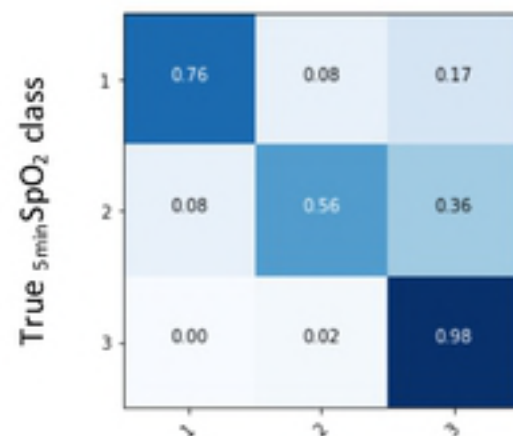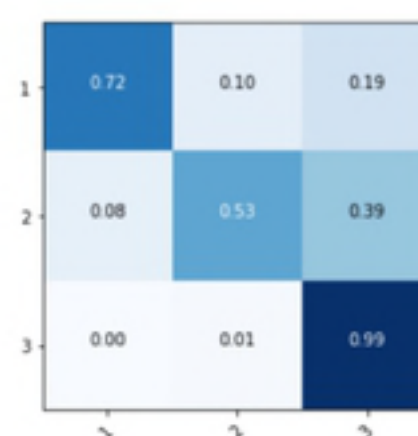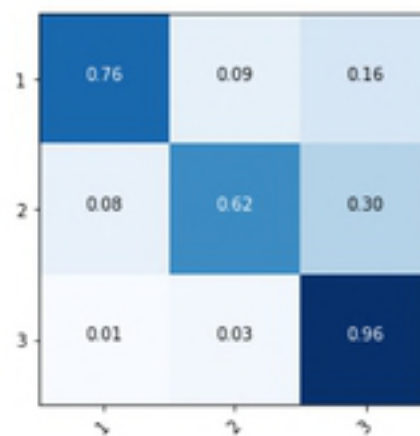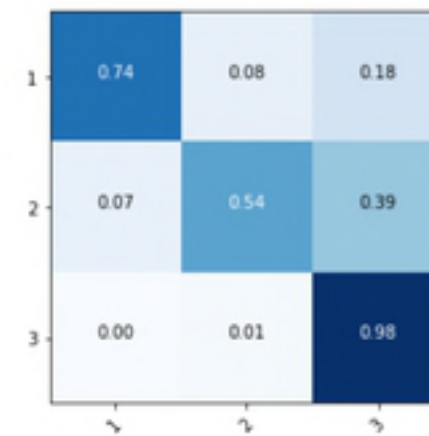Predicted  $_{5\min}\text{SpO}_2$  class**A****B****C****D**

# Training confusion matrix

# Test confusion matrix

ANN

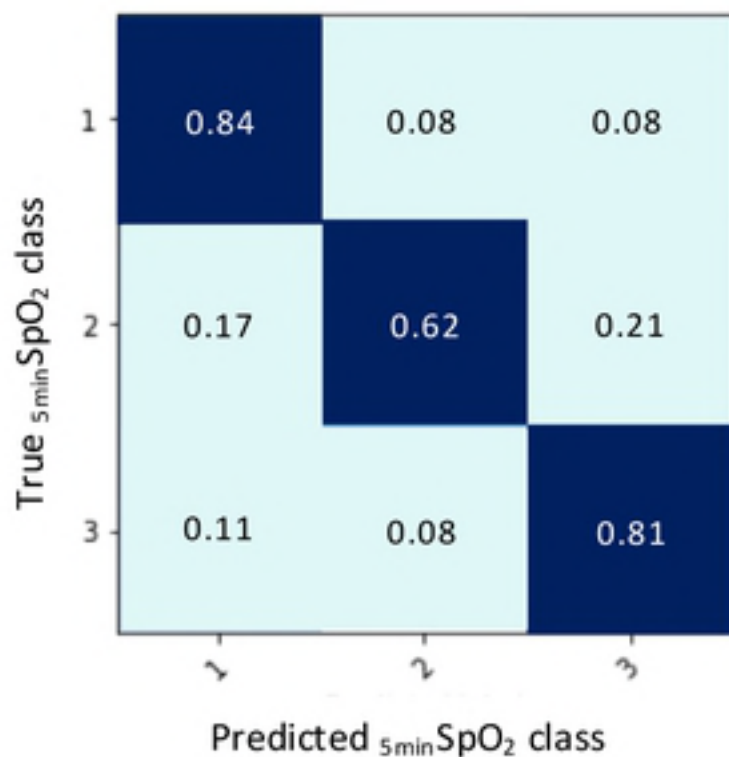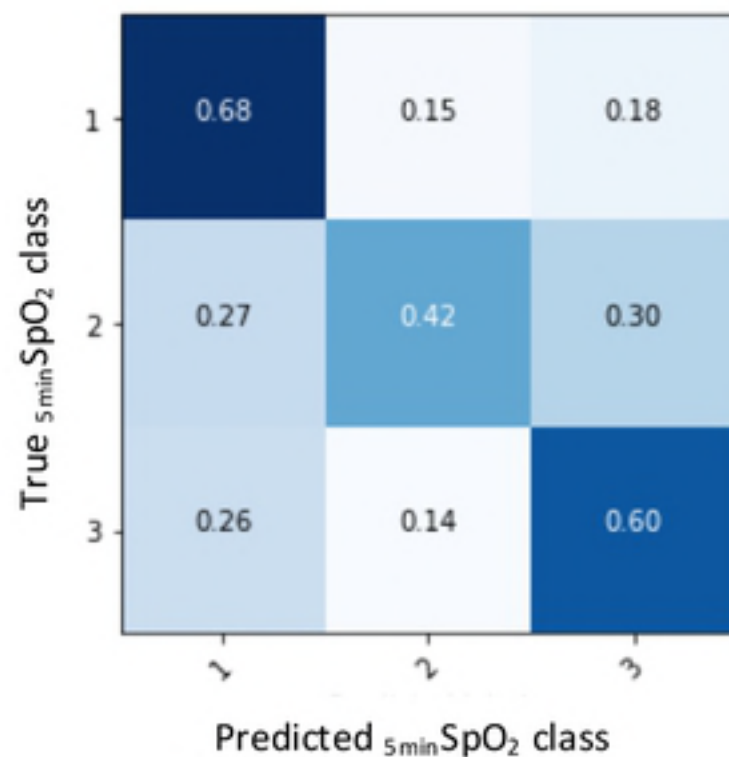

BACDT

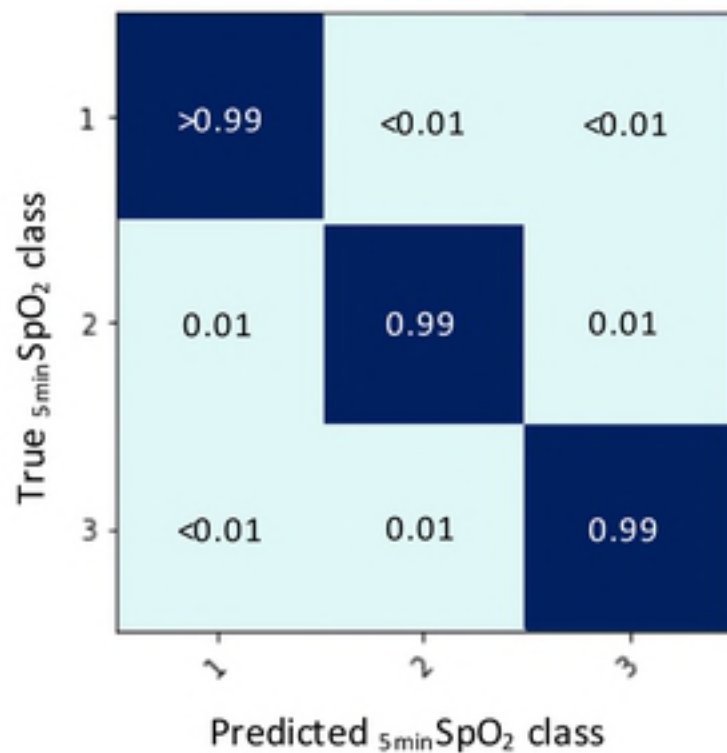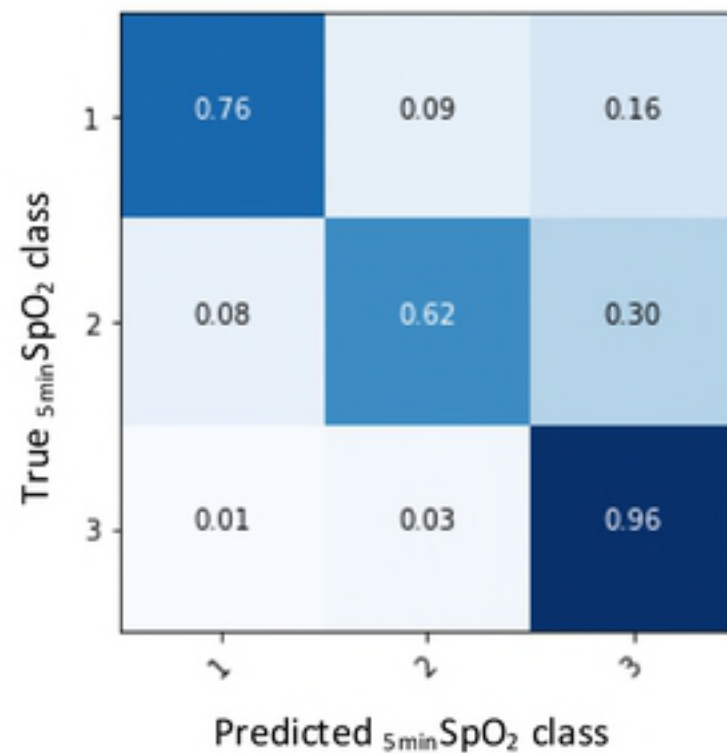

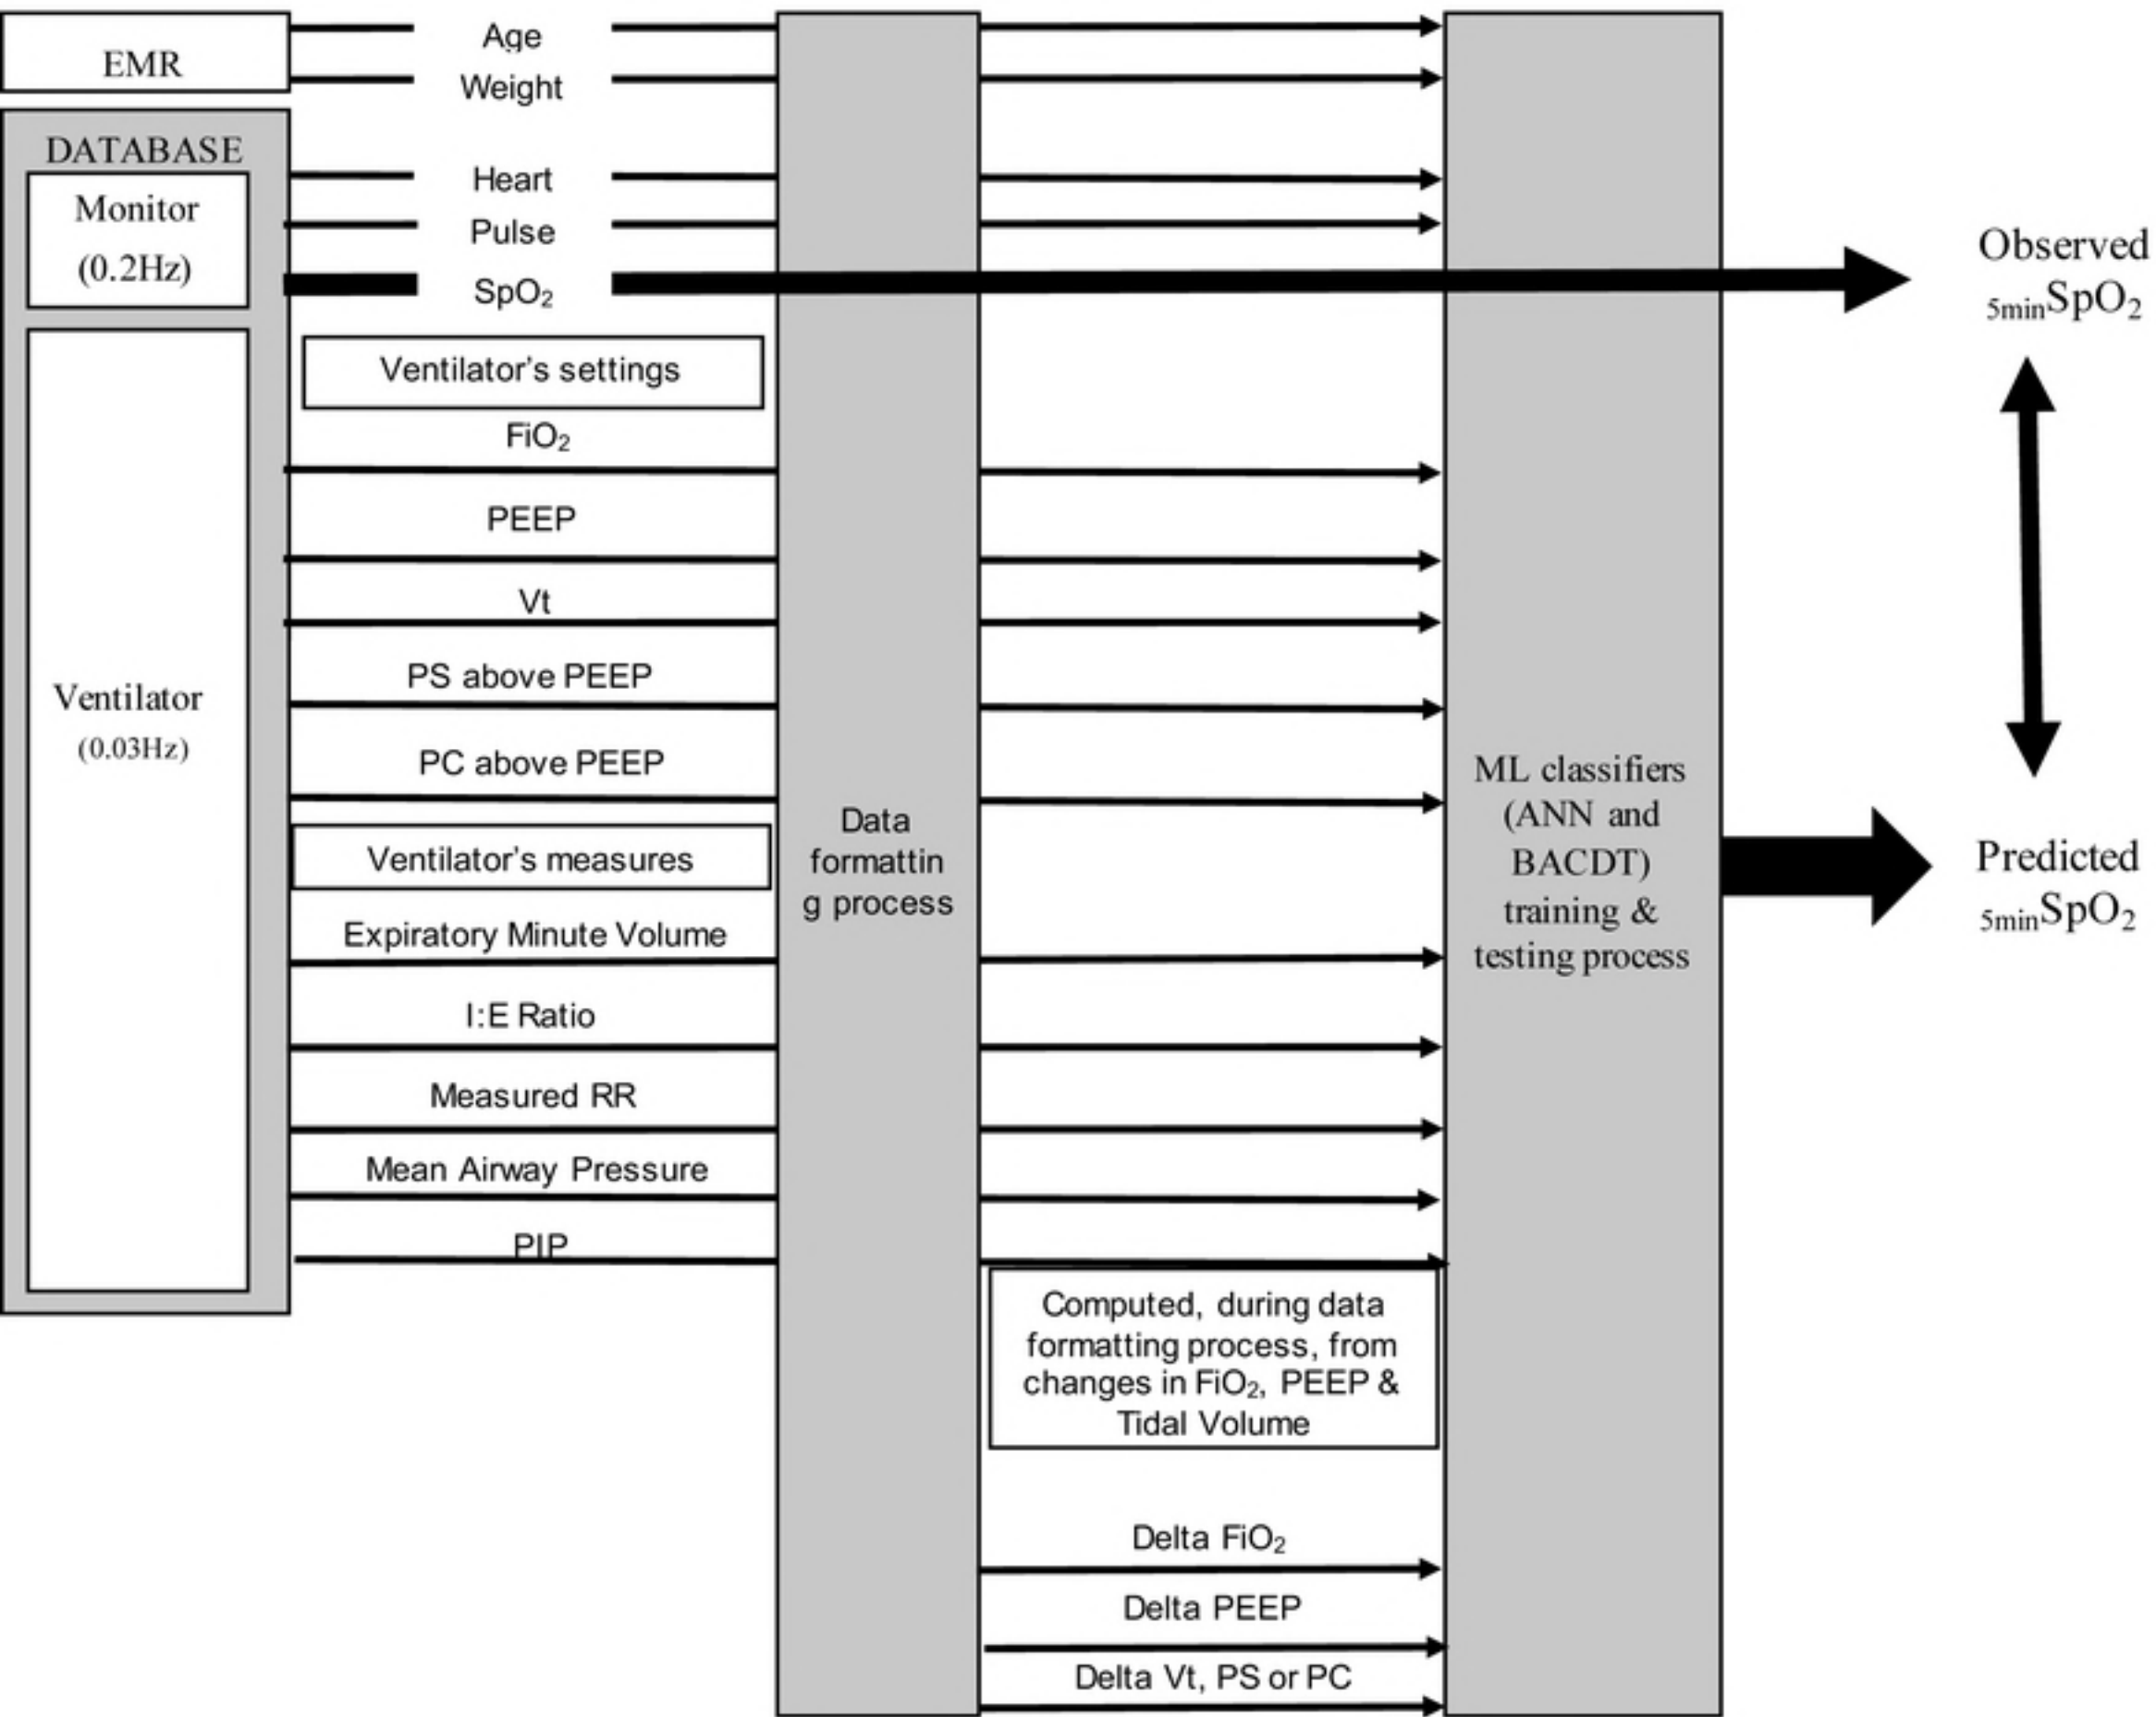

|                                                                                                                                                                                                                                                                                                                                                                                                     |                                                                                                                                                                                   |                                                                                                                                                                                                                                                                                                                                                                                                     |                                                                                                                                                                                                                                                                                                                                                                                                      |
|-----------------------------------------------------------------------------------------------------------------------------------------------------------------------------------------------------------------------------------------------------------------------------------------------------------------------------------------------------------------------------------------------------|-----------------------------------------------------------------------------------------------------------------------------------------------------------------------------------|-----------------------------------------------------------------------------------------------------------------------------------------------------------------------------------------------------------------------------------------------------------------------------------------------------------------------------------------------------------------------------------------------------|------------------------------------------------------------------------------------------------------------------------------------------------------------------------------------------------------------------------------------------------------------------------------------------------------------------------------------------------------------------------------------------------------|
| .....                                                                                                                                                                                                                                                                                                                                                                                               | .....                                                                                                                                                                             | .....                                                                                                                                                                                                                                                                                                                                                                                               | .....                                                                                                                                                                                                                                                                                                                                                                                                |
| Training set: 975,036 samples<br>Test set: 193,528 samples<br>Class Balancing: TOMERK applied to dataset (before dataset has been split into training & test set) to remove tomerk links, random undersampling applied to class 3 once dataset is split into training and testing sub-sets, then SMOTE applied to classes 1 and 2 to make their cardinalities equal to that of class 3 (n=325,012). | Training set: 2,293,119 samples<br>Test set: 201,926 samples<br>Class Balancing: SMOTE applied to classes 1 & 2 to make their cardinalities equal to that of class 3 (n=764,373). | Training set: 487,464 samples<br>Test set: 106,028 samples<br>Class Balancing: TOMERK applied to dataset (before dataset has been split into training & test set) to remove tomerk links, random undersampling applied to class 3 once dataset is split into training and testing sub-sets, then SMOTE applied to classes 1 and 2 to make their cardinalities equal to that of class 3 (n=162,488). | Training set: 1,462,503 samples<br>Test set: 281,028 samples<br>Class Balancing TOMERK applied to dataset (before dataset has been split into training & test set) to remove tomerk links, random undersampling applied to class 3 once dataset is split into training and testing sub-sets, then SMOTE applied to classes 1 and 2 to make their cardinalities equal to that of class 3 (n=487,501). |

- The data-set is first divided into two parts; the training-set and the test-set.
- The training of the “Bagged” Complex Trees includes a k-fold cross-validation, which is performed as follows:
  - Randomly partition the data-set into k equal-sized subsets (folds).
  - For each of the k equal-sized subsets:
    - ✓ Train/fit the model on the elements contained in the other (k-1) subsets.
    - ✓ Test the model’s accuracy on the given subset.
  - Iterate over the k subsets, until each one has been used once for testing the model’s performance during its training.
  - The training validation score consists of the average score obtained by validating the model on all k subsets.
